# Supplementary material for: Evaluating competition for forage plants between honey bees and wild bees in Denmark
Source: PLoS One. 2021 Apr 28;16(4):e0250056. doi: 10.1371/journal.pone.0250056 (PMC8081269; doi:10.1371/journal.pone.0250056)
Supplement: S2 Table — (XLSX) [file pone.0250056.s002.xlsx]

## Sheet: S2 Table
Acanthus (Acanthaceae)
Acer (Sapindaceae)
Achillea (Compositae)
Adonis (Ranunculaceae)
Aegopodium (Apiaceae)
Aesculus (Sapindaceae)
Agastache (Lamiaceae)
Ailanthus (Simaroubaceae)
Ajuga (Lamiaceae)
Alisma (Alismataceae)
Alliaria (Brassicaceae)
Allium (Amaryllidaceae)
Alnus (Betulaceae)
Althaea (Malvaceae)
Alyssum (Brassicaceae)
Amelanchier (Rosaceae)
Anchusa (Boraginaceae)
Anemone (Ranunculaceae)
Anethum (Apiaceae)
Angelica (Apiaceae)
Anthemis (Compositae)
Anthericum (Asparagaceae)
Anthriscus (Apiaceae)
Anthyllis (Leguminosae)
Antirrhinum (Plantaginaceae)
Apium (Apiaceae)
Aquilegia (Ranunculaceae)
Arabis (Brassicaceae)
Aralia (Araliaceae)
Arctium (Compositae)
Argentina (Papaveraceae)
Armeria (Plumbaginaceae)
Aronia (Rosaceae)
Artemisia (Compositae)
Asparagus (Asparagaceae)
Asphodelus (Xanthorrhoeaceae)
Aster (Compositae)
Astragalus (Leguminosae)
Astrantia (Apiaceae)
Atropa (Solanaceae)
Aubrieta (Brassicaceae)
Aurinia (Brassicaceae)
Avena (Poaceae)
Ballota (Lamiaceae)
Barbarea (Brassicaceae)
Begonia (Begoniaceae)
Bellis (Compositae)
Berberis (Berberidaceae)
Berteroa (Brassicaceae)
Beta (Amaranthaceae)
Betonica (Lamiaceae)
Betula (Betulaceae)
Bidens (Compositae)
Bistorta (Polygonaceae)
Borago (Boraginaceae)
Brassica (Brassicaceae)
Brunnera (Boraginaceae)
Bryonia (Cucurbitaceae)
Buddleia (Loganiaceae)
Buddleja (Scrophulariaceae)
Bunias (Brassicaceae)
Buphthalmum (Compositae)
Buxus (Buxaceae)
Cakile (Brassicaceae)
Calendula (Compositae)
Calluna (Ericaceae)
Caltha (Ranunculaceae)
Calystegia (Convolvulaceae)
Campanula (Campanulaceae)
Cannabis (Cannabaceae)
Caragana (Leguminosae)
Cardamine (Brassicaceae)
Carduus (Compositae)
Carlina (Compositae)
Carpinus (Betulaceae)
Carum (Apiaceae)
Castanea (Fagaceae)
Centaurea (Compositae)
Centaurium (Gentianaceae)
Cephalanthera (Orchidaceae)
Cerastium (Caryophyllaceae)
Cerinthe (Boraginaceae)
Chaenomeles (Rosaceae)
Chaerophyllum (Apiaceae)
Chamaecytisus (Leguminosae)
Chamaemelum (Compositae)
Chamaenerion (Onagraceae)
Chelidonium (Papaveraceae)
Chondrilla (Compositae)
Chrysanthemum (Compositae)
Cichorium (Compositae)
Cimicifuga (Ranunculaceae)
Cirsium (Compositae)
Cistus (Cistaceae)
Clarkia (Onagraceae)
Clematis (Ranunculaceae)
Clethra (Clethraceae)
Clinopodium (Lamiaceae)
Colchicum (Colchicaceae)
Conium (Apiaceae)
Consolida (Ranunculaceae)
Convolvulus (Convolvulaceae)
Cornus (Cornaceae)
Corydalis (Papaveraceae)
Corylus (Betulaceae)
Cota (Compositae)
Cotoneaster (Rosaceae)
Crataegus (Rosaceae)
Crepis (Compositae)
Crithmum (Apiaceae)
Crocus (Iridaceae)
Cucumis (Cucurbitaceae)
Cucurbita (Cucurbitaceae)
Cydonia (Rosaceae)
Cymbalaria (Plantaginaceae)
Cynoglossum (Boraginaceae)
Cytisus (Leguminosae)
Dahlia (Compositae)
Daphne (Thymelaeaceae)
Datura (Solanaceae)
Daucus (Apiaceae)
Delphinium (Ranunculaceae)
Dendranthema (Compositae)
Descurainia (Brassicaceae)
Deutzia (Hydrangeaceae)
Dianthus (Caryophyllaceae)
Digitalis (Plantaginaceae)
Diplotaxis (Brassicaceae)
Dipsacus (Caprifoliaceae)
Dorycnium (Leguminosae)
Dracocephalum (Lamiaceae)
Echinops (Compositae)
Echium (Boraginaceae)
Edraianthus (Campanulaceae)
Elaeagnus (Elaeagnaceae)
Epilobium (Onagraceae)
Epimedium (Berberidaceae)
Eranthis (Ranunculaceae)
Eremurus (Xanthorrhoeaceae)
Erica (Ericaceae)
Erigeron (Compositae)
Erodium (Geraniaceae)
Eruca (Brassicaceae)
Eryngium (Apiaceae)
Erysimum (Brassicaceae)
Eschscholzia (Papaveraceae)
Euodia (Rutaceae)
Euonymus (Celastraceae)
Eupatorium (Compositae)
Euphorbia (Euphorbiaceae)
Euphrasia (Orobanchaceae)
Evodia (Rutaceae)
Exochorda (Rosaceae)
Fagopyrum (Polygonaceae)
Fagus (Fagaceae)
Falcaria (Apiaceae)
Ficaria (Ranunculaceae)
Filipendula (Rosaceae)
Foeniculum (Apiaceae)
Fragaria (Rosaceae)
Frangula (Rhamnaceae)
Fraxinus (Oleaceae)
Fritillaria (Liliaceae)
Fuchsia (Onagraceae)
Fumaria (Papaveraceae)
Gagea (Liliaceae)
Galanthus (Amaryllidaceae)
Galega (Leguminosae)
Galeopsis (Lamiaceae)
Galium (Rubiaceae)
Genista (Leguminosae)
Gentiana (Gentianaceae)
Geranium (Geraniaceae)
Geum (Rosaceae)
Glaucium (Papaveraceae)
Glechoma (Lamiaceae)
Gleditsia (Leguminosae)
Glycine (Leguminosae)
Hedera (Araliaceae)
Helenium (Compositae)
Helianthemum (Cistaceae)
Helianthus (Compositae)
Helichrysum (Compositae)
Helleborus (Ranunculaceae)
Helminthotheca (Compositae)
Hepatica (Ranunculaceae)
Heracleum (Apiaceae)
Hesperis (Brassicaceae)
Hibiscus (Malvaceae)
Hieracium (Compositae)
Hippocrepis (Leguminosae)
Hippophae (Elaeagnaceae)
Hirschfeldia (Brassicaceae)
Hordeum (Poaceae)
Hyacinthoides (Asparagaceae)
Hyacinthus (Asparagaceae)
Hydrangea (Hydrangeaceae)
Hylotelephium (Crassulaceae)
Hyoscyamus (Solanaceae)
Hypericum (Hypericaceae)
Hypochaeris (Compositae)
Hyssopus (Lamiaceae)
Iberis (Brassicaceae)
Ilex (Aquifoliaceae)
Impatiens (Balsaminaceae)
Inula (Compositae)
Iris (Iridaceae)
Isatis (Brassicaceae)
Jacobaea (Compositae)
Jasione (Campanulaceae)
Jasminum (Oleaceae)
Juglans (Juglandaceae)
Knautia (Caprifoliaceae)
Kolkwitzia (Caprifoliaceae)
Laburnum (Leguminosae)
Lactuca (Compositae)
Lamium (Lamiaceae)
Lapsana (Compositae)
Larix (Pinaceae)
Laserpitium (Apiaceae)
Lathyrus (Leguminosae)
Lavandula (Lamiaceae)
Leontodon (Compositae)
Leonurus (Lamiaceae)
Lepidium (Brassicaceae)
Leucanthemum (Compositae)
Leucojum (Amaryllidaceae)
Ligularia (Compositae)
Ligustrum (Oleaceae)
Lilium (Liliaceae)
Limonium (Plumbaginaceae)
Linaria (Plantaginaceae)
Linum (Linaceae)
Liriodendron (Magnoliaceae)
Lobelia (Campanulaceae)
Lobularia (Brassicaceae)
Lonicera (Caprifoliaceae)
Lotus (Leguminosae)
Lunaria (Brassicaceae)
Lupinus (Leguminosae)
Lychnis (Caryophyllaceae)
Lycium (Solanaceae)
Lysimachia (Primulaceae)
Lythrum (Lythraceae)
Magnolia (Magnoliaceae)
Mahonia (Berberidaceae)
Malus (Rosaceae)
Malva (Malvaceae)
Matricaria (Compositae)
Medicago (Leguminosae)
Melilotus (Leguminosae)
Melissa (Lamiaceae)
Mentha (Lamiaceae)
Menyanthes (Menyanthaceae)
Mesembryanthemum (Aizoaceae)
Misopates (Plantaginaceae)
Morus (Moraceae)
Muscari (Asparagaceae)
Myosotis (Boraginaceae)
Myrica (Myricaceae)
Narcissus (Amaryllidaceae)
Nemophila (Boraginaceae)
Nepeta (Lamiaceae)
Nicotiana (Solanaceae)
Nigella (Ranunculaceae)
Nonea (Boraginaceae)
Nuphar (Nymphaeaceae)
Nymphaea (Nymphaeaceae)
Odontites (Orobanchaceae)
Oenanthe (Apiaceae)
Oenothera (Onagraceae)
Onobrychis (Leguminosae)
Ononis (Leguminosae)
Onopordum (Compositae)
Origanum (Lamiaceae)
Orlaya (Apiaceae)
Ornithogalum (Asparagaceae)
Ornithopus (Leguminosae)
Othocallis (Compositae)
Pachysandra (Buxaceae)
Paeonia (Paeoniaceae)
Papaver (Papaveraceae)
Parthenocissus (Vitaceae)
Pastinaca (Apiaceae)
Pentaglottis (Boraginaceae)
Persicaria (Polygonaceae)
Petasites (Compositae)
Petroselinum (Apiaceae)
Peucedanum (Apiaceae)
Phacelia (Boraginaceae)
Phaseolus (Leguminosae)
Phellodendron (Rutaceae)
Philadelphus (Hydrangeaceae)
Phlomis (Lamiaceae)
Physalis (Solanaceae)
Physostegia (Lamiaceae)
Phyteuma (Campanulaceae)
Picea (Pinaceae)
Picris (Compositae)
Pieris (Ericaceae)
Pilosella (Compositae)
Pimpinella (Apiaceae)
Pinus (Pinaceae)
Pisum (Leguminosae)
Plantago (Plantaginaceae)
Polemonium (Polemoniaceae)
Polygonatum (Asparagaceae)
Polygonum (Polygonaceae)
Populus (Salicaceae)
Potentilla (Rosaceae)
Primula (Primulaceae)
Prunella (Lamiaceae)
Prunus (Rosaceae)
Pseudofumaria (Papaveraceae)
Pulicaria (Compositae)
Pulmonaria (Boraginaceae)
Pulsatilla (Ranunculaceae)
Pyracantha (Rosaceae)
Pyrus (Rosaceae)
Quercus (Fagaceae)
Ranunculus (Ranunculaceae)
Raphanus (Brassicaceae)
Rapistrum (Brassicaceae)
Reseda (Resedaceae)
Rhamnus (Rhamnaceae)
Rhinanthus (Orobanchaceae)
Rhododendron (Ericaceae)
Rhus (Anacardiaceae)
Ribes (Grossulariaceae)
Robinia (Leguminosae)
Rorippa (Brassicaceae)
Rosa (Rosaceae)
Rubus (Rosaceae)
Rudbeckia (Compositae)
Rumex (Polygonaceae)
Ruta (Rutaceae)
Sagina (Caryophyllaceae)
Salix (Salicaceae)
Salvia (Lamiaceae)
Sambucus (Adoxaceae)
Sanguisorba (Rosaceae)
Saponaria (Caryophyllaceae)
Sarothamnus (Leguminosae)
Saxifraga (Saxifragaceae)
Scabiosa (Caprifoliaceae)
Scilla (Asparagaceae)
Scorzonera (Compositae)
Scrophularia (Scrophulariaceae)
Scutellaria (Lamiaceae)
Secale (Poaceae)
Securigera (Leguminosae)
Sedum (Crassulaceae)
Sempervivum (Crassulaceae)
Senecio (Compositae)
Sherardia (Rubiaceae)
Silene (Caryophyllaceae)
Sinapis (Brassicaceae)
Sisymbrium (Brassicaceae)
Smyrnium (Apiaceae)
Solanum (Solanaceae)
Solidago (Compositae)
Sonchus (Compositae)
Sorbus (Rosaceae)
Spartium (Leguminosae)
Spergula (Caryophyllaceae)
Spinacia (Amaranthaceae)
Spiraea (Rosaceae)
Stachys (Lamiaceae)
Stellaria (Caryophyllaceae)
Styphnolobium (Leguminosae)
Succisa (Caprifoliaceae)
Symphoricarpos (Caprifoliaceae)
Symphyotrichum (Compositae)
Symphytum (Boraginaceae)
Syringa (Oleaceae)
Tanacetum (Compositae)
Taraxacum (Compositae)
Taxus (Taxaceae)
Telekia (Compositae)
Tetragonolobus (Leguminosae)
Teucrium (Lamiaceae)
Thalictrum (Ranunculaceae)
Thlaspi (Brassicaceae)
Thymus (Lamiaceae)
Tilia (Malvaceae)
Torilis (Apiaceae)
Tradescantia (Commelinaceae)
Tragopogon (Compositae)
Trifolium (Leguminosae)
Tripleurospermum (Compositae)
Tripolium (Compositae)
Triticum (Poaceae)
Tropaeolum (Tropaeolaceae)
Tulipa (Liliaceae)
Tussilago (Compositae)
Typha (Typhaceae)
Ulex (Leguminosae)
Ulmus (Ulmaceae)
Urtica (Urticaceae)
Vaccinium (Ericaceae)
Valeriana (Caprifoliaceae)
Verbascum (Scrophulariaceae)
Veronica (Plantaginaceae)
Viburnum (Adoxaceae)
Vicia (Leguminosae)
Viola (Violaceae)
Viscum (Santalaceae)
Vitis (Vitaceae)
Wisteria (Leguminosae)
Zea (Poaceae)
