# Supplementary material for: Evaluating competition for forage plants between honey bees and wild bees in Denmark
Source: PLoS One. 2021 Apr 28;16(4):e0250056. doi: 10.1371/journal.pone.0250056 (PMC8081269; doi:10.1371/journal.pone.0250056)
Supplement: S3 Table — (XLSX) [file pone.0250056.s003.xlsx]

## Sheet: S3 Table
Andrena alfkenella-Angelica
Andrena alfkenella-Anthriscus
Andrena alfkenella-Bellis
Andrena alfkenella-Brassica
Andrena alfkenella-Cardamine
Andrena alfkenella-Centaurea
Andrena alfkenella-Daucus
Andrena alfkenella-Falcaria
Andrena alfkenella-Fragaria
Andrena alfkenella-Lepidium
Andrena alfkenella-Oenanthe
Andrena alfkenella-Pastinaca
Andrena alfkenella-Potentilla
Andrena alfkenella-Prunus
Andrena alfkenella-Sinapis
Andrena alfkenella-Taraxacum
Andrena alfkenella-Thlaspi
Andrena alfkenella-Torilis
Andrena alfkenella-Tripleurospermum
Andrena alfkenella-Veronica
Andrena angustior-Bellis
Andrena angustior-Brassica
Andrena angustior-Crataegus
Andrena angustior-Euphorbia
Andrena angustior-Ficaria
Andrena angustior-Geranium
Andrena angustior-Hyacinthoides
Andrena angustior-Ranunculus
Andrena angustior-Rosa
Andrena angustior-Rubus
Andrena angustior-Stellaria
Andrena angustior-Taraxacum
Andrena angustior-Vaccinium
Andrena angustior-Veronica
Andrena apicata-Prunus
Andrena apicata-Salix
Andrena apicata-Taraxacum
Andrena apicata-Tussilago
Andrena apicata-Ulex
Andrena argentata-Brassica
Andrena argentata-Calluna
Andrena argentata-Crataegus
Andrena argentata-Daucus
Andrena argentata-Eryngium
Andrena argentata-Falcaria
Andrena argentata-Heracleum
Andrena argentata-Pastinaca
Andrena argentata-Pilosella
Andrena argentata-Potentilla
Andrena argentata-Salix
Andrena argentata-Sinapis
Andrena argentata-Taraxacum
Andrena argentata-Tilia
Andrena barbilabris-Acer
Andrena barbilabris-Aegopodium
Andrena barbilabris-Anthriscus
Andrena barbilabris-Brassica
Andrena barbilabris-Chaerophyllum
Andrena barbilabris-Cornus
Andrena barbilabris-Crataegus
Andrena barbilabris-Crepis
Andrena barbilabris-Heracleum
Andrena barbilabris-Hypochaeris
Andrena barbilabris-Ilex
Andrena barbilabris-Jasione
Andrena barbilabris-Ligustrum
Andrena barbilabris-Potentilla
Andrena barbilabris-Prunus
Andrena barbilabris-Quercus
Andrena barbilabris-Ranunculus
Andrena barbilabris-Rosa
Andrena barbilabris-Salix
Andrena barbilabris-Sinapis
Andrena barbilabris-Taraxacum
Andrena barbilabris-Veronica
Andrena bicolor-Anemone
Andrena bicolor-Atropa
Andrena bicolor-Barbarea
Andrena bicolor-Bellis
Andrena bicolor-Berberis
Andrena bicolor-Brassica
Andrena bicolor-Bryonia
Andrena bicolor-Campanula
Andrena bicolor-Cardamine
Andrena bicolor-Convolvulus
Andrena bicolor-Crataegus
Andrena bicolor-Crepis
Andrena bicolor-Ficaria
Andrena bicolor-Geranium
Andrena bicolor-Helleborus
Andrena bicolor-Hyacinthoides
Andrena bicolor-Hypericum
Andrena bicolor-Hypochaeris
Andrena bicolor-Jasione
Andrena bicolor-Leontodon
Andrena bicolor-Lunaria
Andrena bicolor-Lychnis
Andrena bicolor-Malva
Andrena bicolor-Myosotis
Andrena bicolor-Narcissus
Andrena bicolor-Ornithogalum
Andrena bicolor-Othocallis
Andrena bicolor-Potentilla
Andrena bicolor-Primula
Andrena bicolor-Prunus
Andrena bicolor-Pulmonaria
Andrena bicolor-Ranunculus
Andrena bicolor-Rosa
Andrena bicolor-Rubus
Andrena bicolor-Salix
Andrena bicolor-Sinapis
Andrena bicolor-Spiraea
Andrena bicolor-Stellaria
Andrena bicolor-Taraxacum
Andrena bicolor-Thymus
Andrena bicolor-Tussilago
Andrena bicolor-Veronica
Andrena bimaculata-Allium
Andrena bimaculata-Brassica
Andrena bimaculata-Jacobaea
Andrena bimaculata-Picris
Andrena bimaculata-Prunus
Andrena bimaculata-Rubus
Andrena bimaculata-Salix
Andrena bimaculata-Sinapis
Andrena bimaculata-Sisymbrium
Andrena bimaculata-Spiraea
Andrena bimaculata-Tilia
Andrena bimaculata-Ulex
Andrena carantonica-Acer
Andrena carantonica-Aegopodium
Andrena carantonica-Brassica
Andrena carantonica-Chaerophyllum
Andrena carantonica-Cornus
Andrena carantonica-Crataegus
Andrena carantonica-Crepis
Andrena carantonica-Heracleum
Andrena carantonica-Ilex
Andrena carantonica-Prunus
Andrena carantonica-Pyrus
Andrena carantonica-Quercus
Andrena carantonica-Ranunculus
Andrena carantonica-Rosa
Andrena carantonica-Rubus
Andrena carantonica-Salix
Andrena carantonica-Sinapis
Andrena carantonica-Taraxacum
Andrena chrysopyga-Achillea
Andrena chrysopyga-Anthriscus
Andrena chrysopyga-Berteroa
Andrena chrysopyga-Ficaria
Andrena chrysopyga-Heracleum
Andrena chrysopyga-Pilosella
Andrena chrysopyga-Plantago
Andrena chrysopyga-Ranunculus
Andrena chrysopyga-Sinapis
Andrena chrysopyga-Sisymbrium
Andrena chrysopyga-Taraxacum
Andrena chrysopyga-Trifolium
Andrena chrysopyga-Vicia
Andrena chrysosceles-Acer
Andrena chrysosceles-Aegopodium
Andrena chrysosceles-Anthriscus
Andrena chrysosceles-Barbarea
Andrena chrysosceles-Brassica
Andrena chrysosceles-Bunias
Andrena chrysosceles-Cardamine
Andrena chrysosceles-Chaerophyllum
Andrena chrysosceles-Cornus
Andrena chrysosceles-Crataegus
Andrena chrysosceles-Crepis
Andrena chrysosceles-Ficaria
Andrena chrysosceles-Helianthemum
Andrena chrysosceles-Heracleum
Andrena chrysosceles-Ilex
Andrena chrysosceles-Isatis
Andrena chrysosceles-Laserpitium
Andrena chrysosceles-Leucanthemum
Andrena chrysosceles-Orlaya
Andrena chrysosceles-Potentilla
Andrena chrysosceles-Ranunculus
Andrena chrysosceles-Rosa
Andrena chrysosceles-Salix
Andrena chrysosceles-Sedum
Andrena chrysosceles-Sinapis
Andrena chrysosceles-Sisymbrium
Andrena chrysosceles-Taraxacum
Andrena chrysosceles-Veronica
Andrena cineraria-Anthericum
Andrena cineraria-Argentina
Andrena cineraria-Armeria
Andrena cineraria-Brassica
Andrena cineraria-Bunias
Andrena cineraria-Cardamine
Andrena cineraria-Chaerophyllum
Andrena cineraria-Crataegus
Andrena cineraria-Euphorbia
Andrena cineraria-Ficaria
Andrena cineraria-Isatis
Andrena cineraria-Lepidium
Andrena cineraria-Prunus
Andrena cineraria-Ranunculus
Andrena cineraria-Rosa
Andrena cineraria-Salix
Andrena cineraria-Sinapis
Andrena cineraria-Taraxacum
Andrena cineraria-Ulex
Andrena cineraria-Veronica
Andrena clarkella-Salix
Andrena clarkella-Taraxacum
Andrena clarkella-Tussilago
Andrena coitana-Angelica
Andrena coitana-Argentina
Andrena coitana-Campanula
Andrena coitana-Centaurea
Andrena coitana-Cichorium
Andrena coitana-Cirsium
Andrena coitana-Crepis
Andrena coitana-Daucus
Andrena coitana-Dianthus
Andrena coitana-Euphrasia
Andrena coitana-Heracleum
Andrena coitana-Hypericum
Andrena coitana-Hypochaeris
Andrena coitana-Jacobaea
Andrena coitana-Jasione
Andrena coitana-Leontodon
Andrena coitana-Picris
Andrena coitana-Potentilla
Andrena coitana-Ranunculus
Andrena coitana-Salvia
Andrena coitana-Stellaria
Andrena curvungula-Campanula
Andrena curvungula-Phyteuma
Andrena denticulata-Achillea
Andrena denticulata-Centaurea
Andrena denticulata-Cichorium
Andrena denticulata-Cirsium
Andrena denticulata-Hieracium
Andrena denticulata-Hypochaeris
Andrena denticulata-Jacobaea
Andrena denticulata-Leontodon
Andrena denticulata-Picris
Andrena denticulata-Pulicaria
Andrena denticulata-Senecio
Andrena denticulata-Solidago
Andrena denticulata-Tanacetum
Andrena falsifica-Bellis
Andrena falsifica-Fragaria
Andrena falsifica-Potentilla
Andrena falsifica-Quercus
Andrena falsifica-Taraxacum
Andrena falsifica-Veronica
Andrena flavipes-Acer
Andrena flavipes-Achillea
Andrena flavipes-Alliaria
Andrena flavipes-Alyssum
Andrena flavipes-Anthemis
Andrena flavipes-Anthriscus
Andrena flavipes-Aubrieta
Andrena flavipes-Aurinia
Andrena flavipes-Barbarea
Andrena flavipes-Berteroa
Andrena flavipes-Brassica
Andrena flavipes-Bryonia
Andrena flavipes-Campanula
Andrena flavipes-Centaurea
Andrena flavipes-Cirsium
Andrena flavipes-Convolvulus
Andrena flavipes-Crataegus
Andrena flavipes-Crepis
Andrena flavipes-Dorycnium
Andrena flavipes-Eruca
Andrena flavipes-Eryngium
Andrena flavipes-Ficaria
Andrena flavipes-Gentiana
Andrena flavipes-Glechoma
Andrena flavipes-Helianthemum
Andrena flavipes-Heracleum
Andrena flavipes-Hypericum
Andrena flavipes-Hypochaeris
Andrena flavipes-Isatis
Andrena flavipes-Jacobaea
Andrena flavipes-Jasione
Andrena flavipes-Lamium
Andrena flavipes-Leontodon
Andrena flavipes-Leucanthemum
Andrena flavipes-Lotus
Andrena flavipes-Medicago
Andrena flavipes-Melilotus
Andrena flavipes-Ornithogalum
Andrena flavipes-Papaver
Andrena flavipes-Potentilla
Andrena flavipes-Prunus
Andrena flavipes-Pyrus
Andrena flavipes-Quercus
Andrena flavipes-Ranunculus
Andrena flavipes-Rapistrum
Andrena flavipes-Reseda
Andrena flavipes-Rubus
Andrena flavipes-Salix
Andrena flavipes-Senecio
Andrena flavipes-Sinapis
Andrena flavipes-Sisymbrium
Andrena flavipes-Sonchus
Andrena flavipes-Stellaria
Andrena flavipes-Tanacetum
Andrena flavipes-Taraxacum
Andrena flavipes-Trifolium
Andrena flavipes-Tussilago
Andrena flavipes-Veronica
Andrena fucata-Barbarea
Andrena fucata-Brassica
Andrena fucata-Chaerophyllum
Andrena fucata-Cotoneaster
Andrena fucata-Crataegus
Andrena fucata-Euphorbia
Andrena fucata-Ficaria
Andrena fucata-Helianthemum
Andrena fucata-Heracleum
Andrena fucata-Potentilla
Andrena fucata-Ranunculus
Andrena fucata-Ribes
Andrena fucata-Rorippa
Andrena fucata-Rosa
Andrena fucata-Rubus
Andrena fucata-Sinapis
Andrena fucata-Spiraea
Andrena fucata-Vaccinium
Andrena fucata-Veronica
Andrena fulva-Acer
Andrena fulva-Amelanchier
Andrena fulva-Berberis
Andrena fulva-Brassica
Andrena fulva-Buxus
Andrena fulva-Cotoneaster
Andrena fulva-Crataegus
Andrena fulva-Euonymus
Andrena fulva-Ficaria
Andrena fulvago-Centaurea
Andrena fulvago-Crepis
Andrena fulvago-Hypochaeris
Andrena fulvago-Jacobaea
Andrena fulvago-Lapsana
Andrena fulvago-Leontodon
Andrena fulvago-Pilosella
Andrena fulvago-Scorzonera
Andrena fulvago-Taraxacum
Andrena fulvago-Tragopogon
Andrena fulva-Ilex
Andrena fulva-Paeonia
Andrena fulva-Prunus
Andrena fulva-Quercus
Andrena fulva-Ranunculus
Andrena fulva-Ribes
Andrena fulva-Salix
Andrena fulva-Sinapis
Andrena fulva-Taraxacum
Andrena fulva-Vaccinium
Andrena fulva-Veronica
Andrena fulva-Viburnum
Andrena fulvida-Acer
Andrena fulvida-Brassica
Andrena fulvida-Campanula
Andrena fulvida-Cornus
Andrena fulvida-Euphorbia
Andrena fulvida-Ficaria
Andrena fulvida-Frangula
Andrena fulvida-Geranium
Andrena fulvida-Ligustrum
Andrena fulvida-Lilium
Andrena fulvida-Medicago
Andrena fulvida-Plantago
Andrena fulvida-Ranunculus
Andrena fulvida-Rhamnus
Andrena fulvida-Rubus
Andrena fulvida-Sinapis
Andrena fulvida-Vaccinium
Andrena fulvida-Valeriana
Andrena fuscipes-Calluna
Andrena gelriae-Lotus
Andrena gelriae-Onobrychis
Andrena gelriae-Trifolium
Andrena gravida-Achillea
Andrena gravida-Bunias
Andrena gravida-Cardamine
Andrena gravida-Fragaria
Andrena gravida-Leucanthemum
Andrena gravida-Malus
Andrena gravida-Prunus
Andrena gravida-Salix
Andrena gravida-Sinapis
Andrena gravida-Taraxacum
Andrena haemorrhoa-Acer
Andrena haemorrhoa-Aegopodium
Andrena haemorrhoa-Alnus
Andrena haemorrhoa-Alyssum
Andrena haemorrhoa-Anemone
Andrena haemorrhoa-Anthriscus
Andrena haemorrhoa-Argentina
Andrena haemorrhoa-Barbarea
Andrena haemorrhoa-Bellis
Andrena haemorrhoa-Brassica
Andrena haemorrhoa-Bunias
Andrena haemorrhoa-Cardamine
Andrena haemorrhoa-Chaerophyllum
Andrena haemorrhoa-Cornus
Andrena haemorrhoa-Crataegus
Andrena haemorrhoa-Euphorbia
Andrena haemorrhoa-Ficaria
Andrena haemorrhoa-Heracleum
Andrena haemorrhoa-Hesperis
Andrena haemorrhoa-Ilex
Andrena haemorrhoa-Isatis
Andrena haemorrhoa-Laburnum
Andrena haemorrhoa-Malus
Andrena haemorrhoa-Potentilla
Andrena haemorrhoa-Prunus
Andrena haemorrhoa-Pyrus
Andrena haemorrhoa-Quercus
Andrena haemorrhoa-Ranunculus
Andrena haemorrhoa-Reseda
Andrena haemorrhoa-Ribes
Andrena haemorrhoa-Rosa
Andrena haemorrhoa-Salix
Andrena haemorrhoa-Sinapis
Andrena haemorrhoa-Spiraea
Andrena haemorrhoa-Stellaria
Andrena haemorrhoa-Taraxacum
Andrena haemorrhoa-Tussilago
Andrena haemorrhoa-Ulex
Andrena haemorrhoa-Veronica
Andrena hattorfiana-Centaurea
Andrena hattorfiana-Crepis
Andrena hattorfiana-Knautia
Andrena hattorfiana-Pastinaca
Andrena hattorfiana-Scabiosa
Andrena hattorfiana-Trifolium
Andrena helvola-Acer
Andrena helvola-Allium
Andrena helvola-Crataegus
Andrena helvola-Euphorbia
Andrena helvola-Frangula
Andrena helvola-Malus
Andrena helvola-Prunus
Andrena helvola-Rhamnus
Andrena helvola-Ribes
Andrena helvola-Rosa
Andrena helvola-Taraxacum
Andrena helvola-Viburnum
Andrena humilis-Crepis
Andrena humilis-Hieracium
Andrena humilis-Hypochaeris
Andrena humilis-Leontodon
Andrena humilis-Pilosella
Andrena humilis-Taraxacum
Andrena humilis-Tragopogon
Andrena intermedia-Genista
Andrena intermedia-Trifolium
Andrena labialis-Anthyllis
Andrena labialis-Galega
Andrena labialis-Lotus
Andrena labialis-Medicago
Andrena labialis-Trifolium
Andrena labialis-Vicia
Andrena labiata-Barbarea
Andrena labiata-Brassica
Andrena labiata-Cerastium
Andrena labiata-Crataegus
Andrena labiata-Crepis
Andrena labiata-Ficaria
Andrena labiata-Helianthemum
Andrena labiata-Hypochaeris
Andrena labiata-Leontodon
Andrena labiata-Lepidium
Andrena labiata-Myosotis
Andrena labiata-Potentilla
Andrena labiata-Ranunculus
Andrena labiata-Rosa
Andrena labiata-Salvia
Andrena labiata-Silene
Andrena labiata-Sinapis
Andrena labiata-Sisymbrium
Andrena labiata-Stellaria
Andrena labiata-Taraxacum
Andrena labiata-Veronica
Andrena lapponica-Crataegus
Andrena lapponica-Prunus
Andrena lapponica-Rhododendron
Andrena lapponica-Salix
Andrena lapponica-Taraxacum
Andrena lapponica-Vaccinium
Andrena lapponica-Veronica
Andrena lapponica-Viola
Andrena lathyri-Lathyrus
Andrena lathyri-Vicia
Andrena marginata-Centaurea
Andrena marginata-Cirsium
Andrena marginata-Epilobium
Andrena marginata-Filipendula
Andrena marginata-Knautia
Andrena marginata-Rubus
Andrena marginata-Scabiosa
Andrena marginata-Succisa
Andrena minutula-Acer
Andrena minutula-Achillea
Andrena minutula-Aegopodium
Andrena minutula-Angelica
Andrena minutula-Anthriscus
Andrena minutula-Bellis
Andrena minutula-Brassica
Andrena minutula-Bunias
Andrena minutula-Cardamine
Andrena minutula-Carum
Andrena minutula-Crataegus
Andrena minutula-Crepis
Andrena minutula-Daucus
Andrena minutula-Falcaria
Andrena minutula-Ficaria
Andrena minutula-Fragaria
Andrena minutula-Heracleum
Andrena minutula-Isatis
Andrena minutula-Lepidium
Andrena minutula-Malus
Andrena minutula-Origanum
Andrena minutula-Peucedanum
Andrena minutula-Pilosella
Andrena minutula-Potentilla
Andrena minutula-Prunus
Andrena minutula-Ranunculus
Andrena minutula-Ribes
Andrena minutula-Rubus
Andrena minutula-Salix
Andrena minutula-Sedum
Andrena minutula-Sinapis
Andrena minutula-Spiraea
Andrena minutula-Stellaria
Andrena minutula-Taraxacum
Andrena minutula-Thlaspi
Andrena minutula-Tussilago
Andrena minutula-Veronica
Andrena minutuloides-Acer
Andrena minutuloides-Aegopodium
Andrena minutuloides-Angelica
Andrena minutuloides-Anthriscus
Andrena minutuloides-Bellis
Andrena minutuloides-Brassica
Andrena minutuloides-Crataegus
Andrena minutuloides-Crepis
Andrena minutuloides-Daucus
Andrena minutuloides-Euphorbia
Andrena minutuloides-Falcaria
Andrena minutuloides-Fragaria
Andrena minutuloides-Heracleum
Andrena minutuloides-Lepidium
Andrena minutuloides-Malus
Andrena minutuloides-Pastinaca
Andrena minutuloides-Pimpinella
Andrena minutuloides-Potentilla
Andrena minutuloides-Prunus
Andrena minutuloides-Rubus
Andrena minutuloides-Salix
Andrena minutuloides-Sedum
Andrena minutuloides-Sinapis
Andrena minutuloides-Taraxacum
Andrena minutuloides-Thlaspi
Andrena minutuloides-Torilis
Andrena minutuloides-Tussilago
Andrena minutuloides-Veronica
Andrena nanula-Angelica
Andrena nanula-Daucus
Andrena nanula-Pimpinella
Andrena nasuta-Anchusa
Andrena nigriceps-Calluna
Andrena nigriceps-Centaurea
Andrena nigriceps-Cirsium
Andrena nigriceps-Dianthus
Andrena nigriceps-Echium
Andrena nigriceps-Filipendula
Andrena nigriceps-Galium
Andrena nigriceps-Hieracium
Andrena nigriceps-Jacobaea
Andrena nigriceps-Jasione
Andrena nigriceps-Rubus
Andrena nigriceps-Salvia
Andrena nigriceps-Scabiosa
Andrena nigriceps-Sedum
Andrena nigriceps-Sinapis
Andrena nigriceps-Tanacetum
Andrena nigriceps-Thymus
Andrena nigroaenea-Anthriscus
Andrena nigroaenea-Armeria
Andrena nigroaenea-Berteroa
Andrena nigroaenea-Brassica
Andrena nigroaenea-Bryonia
Andrena nigroaenea-Chaerophyllum
Andrena nigroaenea-Chelidonium
Andrena nigroaenea-Crataegus
Andrena nigroaenea-Crepis
Andrena nigroaenea-Euphorbia
Andrena nigroaenea-Ficaria
Andrena nigroaenea-Helianthemum
Andrena nigroaenea-Heracleum
Andrena nigroaenea-Ilex
Andrena nigroaenea-Isatis
Andrena nigroaenea-Lepidium
Andrena nigroaenea-Prunus
Andrena nigroaenea-Ranunculus
Andrena nigroaenea-Reseda
Andrena nigroaenea-Rubus
Andrena nigroaenea-Salix
Andrena nigroaenea-Sinapis
Andrena nigroaenea-Sisymbrium
Andrena nigroaenea-Stellaria
Andrena nigroaenea-Taraxacum
Andrena nigroaenea-Trifolium
Andrena nigroaenea-Ulex
Andrena nigroaenea-Vaccinium
Andrena nigroaenea-Vitis
Andrena nigrospina-Brassica
Andrena nigrospina-Crepis
Andrena nigrospina-Heracleum
Andrena nigrospina-Hirschfeldia
Andrena nigrospina-Hypochaeris
Andrena nigrospina-Papaver
Andrena nigrospina-Raphanus
Andrena nigrospina-Rubus
Andrena nitida-Acer
Andrena nitida-Aesculus
Andrena nitida-Allium
Andrena nitida-Angelica
Andrena nitida-Anthriscus
Andrena nitida-Brassica
Andrena nitida-Cardamine
Andrena nitida-Cornus
Andrena nitida-Cotoneaster
Andrena nitida-Crataegus
Andrena nitida-Crepis
Andrena nitida-Ficaria
Andrena nitida-Helianthemum
Andrena nitida-Heracleum
Andrena nitida-Ilex
Andrena nitida-Lamium
Andrena nitida-Ornithogalum
Andrena nitida-Prunus
Andrena nitida-Pyrus
Andrena nitida-Ranunculus
Andrena nitida-Ribes
Andrena nitida-Rubus
Andrena nitida-Salix
Andrena nitida-Saxifraga
Andrena nitida-Sinapis
Andrena nitida-Sisymbrium
Andrena nitida-Stellaria
Andrena nitida-Taraxacum
Andrena nitida-Tussilago
Andrena nitida-Ulex
Andrena nitida-Veronica
Andrena niveata-Brassica
Andrena niveata-Crataegus
Andrena niveata-Lepidium
Andrena niveata-Raphanus
Andrena niveata-Sinapis
Andrena niveata-Sisymbrium
Andrena niveata-Thlaspi
Andrena niveata-Veronica
Andrena nycthemera-Salix
Andrena ovatula-Calluna
Andrena ovatula-Dorycnium
Andrena ovatula-Genista
Andrena ovatula-Lotus
Andrena ovatula-Melilotus
Andrena ovatula-Prunus
Andrena ovatula-Rubus
Andrena ovatula-Salix
Andrena ovatula-Trifolium
Andrena ovatula-Ulex
Andrena ovatula-Vicia
Andrena praecox-Salix
Andrena proxima-Aegopodium
Andrena proxima-Anthriscus
Andrena proxima-Chaerophyllum
Andrena proxima-Conium
Andrena proxima-Crataegus
Andrena proxima-Daucus
Andrena proxima-Euphorbia
Andrena proxima-Falcaria
Andrena proxima-Heracleum
Andrena proxima-Laserpitium
Andrena proxima-Oenanthe
Andrena proxima-Orlaya
Andrena proxima-Smyrnium
Andrena ruficrus-Salix
Andrena ruficrus-Taraxacum
Andrena schencki-Achillea
Andrena schencki-Brassica
Andrena schencki-Centaurea
Andrena schencki-Cornus
Andrena schencki-Knautia
Andrena schencki-Leucanthemum
Andrena schencki-Trifolium
Andrena schencki-Vicia
Andrena semilaevis-Aegopodium
Andrena semilaevis-Anthriscus
Andrena semilaevis-Taraxacum
Andrena semilaevis-Veronica
Andrena similis-Fumaria
Andrena similis-Genista
Andrena similis-Glechoma
Andrena similis-Lotus
Andrena similis-Taraxacum
Andrena similis-Trifolium
Andrena similis-Ulex
Andrena similis-Veronica
Andrena simillima-Centaurea
Andrena simillima-Cirsium
Andrena simillima-Eupatorium
Andrena simillima-Origanum
Andrena simillima-Pulicaria
Andrena simillima-Rubus
Andrena subopaca-Fragaria
Andrena subopaca-Ornithogalum
Andrena subopaca-Potentilla
Andrena subopaca-Rosa
Andrena subopaca-Rubus
Andrena subopaca-Sinapis
Andrena subopaca-Stellaria
Andrena subopaca-Veronica
Andrena synadelpha-Acer
Andrena synadelpha-Brassica
Andrena synadelpha-Chaerophyllum
Andrena synadelpha-Chamaecytisus
Andrena synadelpha-Crataegus
Andrena synadelpha-Euphorbia
Andrena synadelpha-Ilex
Andrena synadelpha-Prunus
Andrena synadelpha-Quercus
Andrena synadelpha-Rosa
Andrena synadelpha-Rubus
Andrena synadelpha-Salix
Andrena synadelpha-Taraxacum
Andrena synadelpha-Ulex
Andrena tarsata-Achillea
Andrena tarsata-Angelica
Andrena tarsata-Argentina
Andrena tarsata-Calluna
Andrena tarsata-Campanula
Andrena tarsata-Potentilla
Andrena tarsata-Rubus
Andrena thoracica-Acer
Andrena thoracica-Allium
Andrena thoracica-Campanula
Andrena thoracica-Cardamine
Andrena thoracica-Centaurea
Andrena thoracica-Chamaenerion
Andrena thoracica-Cirsium
Andrena thoracica-Ficaria
Andrena thoracica-Glechoma
Andrena thoracica-Heracleum
Andrena thoracica-Hypochaeris
Andrena thoracica-Jacobaea
Andrena thoracica-Jasione
Andrena thoracica-Oenanthe
Andrena thoracica-Prunus
Andrena thoracica-Pyrus
Andrena thoracica-Rubus
Andrena thoracica-Salix
Andrena thoracica-Sinapis
Andrena thoracica-Stellaria
Andrena thoracica-Tanacetum
Andrena thoracica-Taraxacum
Andrena thoracica-Tilia
Andrena thoracica-Tussilago
Andrena tibialis-Acer
Andrena tibialis-Brassica
Andrena tibialis-Crataegus
Andrena tibialis-Malus
Andrena tibialis-Prunus
Andrena tibialis-Quercus
Andrena tibialis-Salix
Andrena tibialis-Senecio
Andrena tibialis-Sinapis
Andrena tibialis-Taraxacum
Andrena tibialis-Tussilago
Andrena tibialis-Ulex
Andrena vaga-Salix
Andrena varians-Acer
Andrena varians-Anthriscus
Andrena varians-Barbarea
Andrena varians-Berberis
Andrena varians-Betula
Andrena varians-Brassica
Andrena varians-Cotoneaster
Andrena varians-Crataegus
Andrena varians-Ficaria
Andrena varians-Ilex
Andrena varians-Malus
Andrena varians-Prunus
Andrena varians-Pyrus
Andrena varians-Ranunculus
Andrena varians-Ribes
Andrena varians-Salix
Andrena varians-Stellaria
Andrena varians-Taraxacum
Andrena varians-Tussilago
Andrena viridescens-Veronica
Andrena wilkella-Cytisus
Andrena wilkella-Euphorbia
Andrena wilkella-Genista
Andrena wilkella-Lotus
Andrena wilkella-Medicago
Andrena wilkella-Melilotus
Andrena wilkella-Onobrychis
Andrena wilkella-Ononis
Andrena wilkella-Trifolium
Andrena wilkella-Ulex
Andrena wilkella-Vicia
Anthidiellum strigatum-Helianthemum
Anthidiellum strigatum-Jasione
Anthidiellum strigatum-Lotus
Anthidiellum strigatum-Medicago
Anthidiellum strigatum-Potentilla
Anthidiellum strigatum-Sedum
Anthidiellum strigatum-Sempervivum
Anthidiellum strigatum-Trifolium
Anthidium manicatum-Anthyllis
Anthidium manicatum-Antirrhinum
Anthidium manicatum-Ballota
Anthidium manicatum-Betonica
Anthidium manicatum-Clinopodium
Anthidium manicatum-Digitalis
Anthidium manicatum-Galega
Anthidium manicatum-Galeopsis
Anthidium manicatum-Lamium
Anthidium manicatum-Leonurus
Anthidium manicatum-Linaria
Anthidium manicatum-Lotus
Anthidium manicatum-Lupinus
Anthidium manicatum-Medicago
Anthidium manicatum-Melissa
Anthidium manicatum-Misopates
Anthidium manicatum-Nepeta
Anthidium manicatum-Ononis
Anthidium manicatum-Phlomis
Anthidium manicatum-Salvia
Anthidium manicatum-Scutellaria
Anthidium manicatum-Securigera
Anthidium manicatum-Stachys
Anthidium manicatum-Teucrium
Anthidium manicatum-Vicia
Anthidium punctatum-Lotus
Anthidium punctatum-Medicago
Anthidium punctatum-Melilotus
Anthidium punctatum-Ononis
Anthidium punctatum-Reseda
Anthidium punctatum-Sedum
Anthidium punctatum-Trifolium
Anthophora aestivalis-Ajuga
Anthophora aestivalis-Anchusa
Anthophora aestivalis-Anthyllis
Anthophora aestivalis-Astragalus
Anthophora aestivalis-Glechoma
Anthophora aestivalis-Helianthemum
Anthophora aestivalis-Lamium
Anthophora aestivalis-Onobrychis
Anthophora aestivalis-Salvia
Anthophora aestivalis-Trifolium
Anthophora bimaculata-Anchusa
Anthophora bimaculata-Arctium
Anthophora bimaculata-Ballota
Anthophora bimaculata-Calluna
Anthophora bimaculata-Calystegia
Anthophora bimaculata-Centaurea
Anthophora bimaculata-Cirsium
Anthophora bimaculata-Echium
Anthophora bimaculata-Epilobium
Anthophora bimaculata-Hypericum
Anthophora bimaculata-Hypochaeris
Anthophora bimaculata-Inula
Anthophora bimaculata-Jacobaea
Anthophora bimaculata-Jasione
Anthophora bimaculata-Limonium
Anthophora bimaculata-Lythrum
Anthophora bimaculata-Nepeta
Anthophora bimaculata-Picris
Anthophora bimaculata-Potentilla
Anthophora bimaculata-Rubus
Anthophora bimaculata-Teucrium
Anthophora bimaculata-Thymus
Anthophora bimaculata-Trifolium
Anthophora furcata-Ballota
Anthophora furcata-Betonica
Anthophora furcata-Centaurea
Anthophora furcata-Cirsium
Anthophora furcata-Galeopsis
Anthophora furcata-Linaria
Anthophora furcata-Lycium
Anthophora furcata-Nepeta
Anthophora furcata-Rubus
Anthophora furcata-Solanum
Anthophora furcata-Stachys
Anthophora furcata-Teucrium
Anthophora plagiata-Echium
Anthophora plagiata-Helianthemum
Anthophora plagiata-Lamium
Anthophora plagiata-Lotus
Anthophora plagiata-Ononis
Anthophora plagiata-Trifolium
Anthophora plagiata-Vicia
Anthophora plumipes-Aesculus
Anthophora plumipes-Ajuga
Anthophora plumipes-Anchusa
Anthophora plumipes-Aubrieta
Anthophora plumipes-Brassica
Anthophora plumipes-Corydalis
Anthophora plumipes-Epimedium
Anthophora plumipes-Erysimum
Anthophora plumipes-Glechoma
Anthophora plumipes-Iris
Anthophora plumipes-Lamium
Anthophora plumipes-Malus
Anthophora plumipes-Nepeta
Anthophora plumipes-Nonea
Anthophora plumipes-Pentaglottis
Anthophora plumipes-Primula
Anthophora plumipes-Prunus
Anthophora plumipes-Pulmonaria
Anthophora plumipes-Pyrus
Anthophora plumipes-Ribes
Anthophora plumipes-Salix
Anthophora plumipes-Symphytum
Anthophora plumipes-Trifolium
Anthophora plumipes-Tulipa
Anthophora plumipes-Ulex
Anthophora plumipes-Veronica
Anthophora quadrimaculata-Anchusa
Anthophora quadrimaculata-Ballota
Anthophora quadrimaculata-Betonica
Anthophora quadrimaculata-Centaurium
Anthophora quadrimaculata-Echium
Anthophora quadrimaculata-Lamium
Anthophora quadrimaculata-Lavandula
Anthophora quadrimaculata-Nepeta
Anthophora quadrimaculata-Ononis
Anthophora quadrimaculata-Salvia
Anthophora quadrimaculata-Sedum
Anthophora quadrimaculata-Sinapis
Anthophora quadrimaculata-Solanum
Anthophora quadrimaculata-Teucrium
Anthophora quadrimaculata-Trifolium
Anthophora retusa-Acer
Anthophora retusa-Ajuga
Anthophora retusa-Anthyllis
Anthophora retusa-Armeria
Anthophora retusa-Cynoglossum
Anthophora retusa-Echium
Anthophora retusa-Galeopsis
Anthophora retusa-Glechoma
Anthophora retusa-Iris
Anthophora retusa-Lotus
Anthophora retusa-Oenanthe
Anthophora retusa-Sinapis
Anthophora retusa-Trifolium
Anthophora retusa-Vicia
Apis mellifera-Acanthus
Apis mellifera-Acer
Apis mellifera-Achillea
Apis mellifera-Aegopodium
Apis mellifera-Aesculus
Apis mellifera-Agastache
Apis mellifera-Ailanthus
Apis mellifera-Ajuga
Apis mellifera-Alisma
Apis mellifera-Allium
Apis mellifera-Alnus
Apis mellifera-Althaea
Apis mellifera-Alyssum
Apis mellifera-Amelanchier
Apis mellifera-Anchusa
Apis mellifera-Anemone
Apis mellifera-Anethum
Apis mellifera-Angelica
Apis mellifera-Anthriscus
Apis mellifera-Apium
Apis mellifera-Aquilegia
Apis mellifera-Arabis
Apis mellifera-Aralia
Apis mellifera-Arctium
Apis mellifera-Aronia
Apis mellifera-Artemisia
Apis mellifera-Asparagus
Apis mellifera-Aster
Apis mellifera-Astrantia
Apis mellifera-Aubrieta
Apis mellifera-Avena
Apis mellifera-Barbarea
Apis mellifera-Begonia
Apis mellifera-Bellis
Apis mellifera-Berberis
Apis mellifera-Beta
Apis mellifera-Betula
Apis mellifera-Bidens
Apis mellifera-Bistorta
Apis mellifera-Borago
Apis mellifera-Brassica
Apis mellifera-Brunnera
Apis mellifera-Buddleja
Apis mellifera-Buxus
Apis mellifera-Calendula
Apis mellifera-Calluna
Apis mellifera-Caltha
Apis mellifera-Calystegia
Apis mellifera-Campanula
Apis mellifera-Cannabis
Apis mellifera-Caragana
Apis mellifera-Cardamine
Apis mellifera-Carduus
Apis mellifera-Carpinus
Apis mellifera-Carum
Apis mellifera-Castanea
Apis mellifera-Centaurea
Apis mellifera-Cerastium
Apis mellifera-Chaenomeles
Apis mellifera-Chaerophyllum
Apis mellifera-Chamaenerion
Apis mellifera-Chelidonium
Apis mellifera-Chrysanthemum
Apis mellifera-Cichorium
Apis mellifera-Cimicifuga
Apis mellifera-Clarkia
Apis mellifera-Clematis
Apis mellifera-Clethra
Apis mellifera-Clinopodium
Apis mellifera-Colchicum
Apis mellifera-Convolvulus
Apis mellifera-Cornus
Apis mellifera-Corydalis
Apis mellifera-Corylus
Apis mellifera-Cotoneaster
Apis mellifera-Crataegus
Apis mellifera-Crocus
Apis mellifera-Cucumis
Apis mellifera-Cucurbita
Apis mellifera-Cydonia
Apis mellifera-Cymbalaria
Apis mellifera-Cynoglossum
Apis mellifera-Cytisus
Apis mellifera-Dahlia
Apis mellifera-Daphne
Apis mellifera-Datura
Apis mellifera-Daucus
Apis mellifera-Delphinium
Apis mellifera-Deutzia
Apis mellifera-Dipsacus
Apis mellifera-Dracocephalum
Apis mellifera-Echinops
Apis mellifera-Echium
Apis mellifera-Elaeagnus
Apis mellifera-Epilobium
Apis mellifera-Eranthis
Apis mellifera-Eremurus
Apis mellifera-Erica
Apis mellifera-Erodium
Apis mellifera-Eryngium
Apis mellifera-Erysimum
Apis mellifera-Eschscholzia
Apis mellifera-Euodia
Apis mellifera-Euonymus
Apis mellifera-Eupatorium
Apis mellifera-Euphorbia
Apis mellifera-Evodia
Apis mellifera-Exochorda
Apis mellifera-Fagopyrum
Apis mellifera-Fagus
Apis mellifera-Ficaria
Apis mellifera-Filipendula
Apis mellifera-Foeniculum
Apis mellifera-Fragaria
Apis mellifera-Frangula
Apis mellifera-Fraxinus
Apis mellifera-Fritillaria
Apis mellifera-Fuchsia
Apis mellifera-Gagea
Apis mellifera-Galanthus
Apis mellifera-Galeopsis
Apis mellifera-Genista
Apis mellifera-Geranium
Apis mellifera-Gleditsia
Apis mellifera-Glycine
Apis mellifera-Hedera
Apis mellifera-Helenium
Apis mellifera-Helianthemum
Apis mellifera-Helianthus
Apis mellifera-Helleborus
Apis mellifera-Hepatica
Apis mellifera-Heracleum
Apis mellifera-Hibiscus
Apis mellifera-Hippophae
Apis mellifera-Hordeum
Apis mellifera-Hyacinthus
Apis mellifera-Hydrangea
Apis mellifera-Hylotelephium
Apis mellifera-Hyoscyamus
Apis mellifera-Hypericum
Apis mellifera-Hyssopus
Apis mellifera-Iberis
Apis mellifera-Ilex
Apis mellifera-Impatiens
Apis mellifera-Jasione
Apis mellifera-Jasminum
Apis mellifera-Juglans
Apis mellifera-Knautia
Apis mellifera-Kolkwitzia
Apis mellifera-Laburnum
Apis mellifera-Lactuca
Apis mellifera-Lamium
Apis mellifera-Larix
Apis mellifera-Lathyrus
Apis mellifera-Lavandula
Apis mellifera-Leontodon
Apis mellifera-Leonurus
Apis mellifera-Lepidium
Apis mellifera-Leucojum
Apis mellifera-Ligularia
Apis mellifera-Ligustrum
Apis mellifera-Lilium
Apis mellifera-Limonium
Apis mellifera-Linaria
Apis mellifera-Linum
Apis mellifera-Liriodendron
Apis mellifera-Lobelia
Apis mellifera-Lonicera
Apis mellifera-Lotus
Apis mellifera-Lunaria
Apis mellifera-Lupinus
Apis mellifera-Lycium
Apis mellifera-Lythrum
Apis mellifera-Magnolia
Apis mellifera-Mahonia
Apis mellifera-Malus
Apis mellifera-Malva
Apis mellifera-Medicago
Apis mellifera-Melilotus
Apis mellifera-Melissa
Apis mellifera-Mentha
Apis mellifera-Morus
Apis mellifera-Muscari
Apis mellifera-Myosotis
Apis mellifera-Myrica
Apis mellifera-Narcissus
Apis mellifera-Nemophila
Apis mellifera-Nepeta
Apis mellifera-Nicotiana
Apis mellifera-Nigella
Apis mellifera-Nuphar
Apis mellifera-Nymphaea
Apis mellifera-Oenothera
Apis mellifera-Onobrychis
Apis mellifera-Onopordum
Apis mellifera-Origanum
Apis mellifera-Ornithopus
Apis mellifera-Pachysandra
Apis mellifera-Papaver
Apis mellifera-Parthenocissus
Apis mellifera-Pastinaca
Apis mellifera-Persicaria
Apis mellifera-Petasites
Apis mellifera-Petroselinum
Apis mellifera-Phacelia
Apis mellifera-Phaseolus
Apis mellifera-Phellodendron
Apis mellifera-Philadelphus
Apis mellifera-Physalis
Apis mellifera-Physostegia
Apis mellifera-Picea
Apis mellifera-Pieris
Apis mellifera-Pinus
Apis mellifera-Pisum
Apis mellifera-Plantago
Apis mellifera-Polemonium
Apis mellifera-Polygonum
Apis mellifera-Populus
Apis mellifera-Potentilla
Apis mellifera-Primula
Apis mellifera-Prunus
Apis mellifera-Pseudofumaria
Apis mellifera-Pulmonaria
Apis mellifera-Pulsatilla
Apis mellifera-Pyracantha
Apis mellifera-Pyrus
Apis mellifera-Quercus
Apis mellifera-Ranunculus
Apis mellifera-Raphanus
Apis mellifera-Reseda
Apis mellifera-Rhamnus
Apis mellifera-Rhododendron
Apis mellifera-Rhus
Apis mellifera-Ribes
Apis mellifera-Robinia
Apis mellifera-Rosa
Apis mellifera-Rubus
Apis mellifera-Rudbeckia
Apis mellifera-Rumex
Apis mellifera-Ruta
Apis mellifera-Salix
Apis mellifera-Salvia
Apis mellifera-Sambucus
Apis mellifera-Sanguisorba
Apis mellifera-Saponaria
Apis mellifera-Sarothamnus
Apis mellifera-Saxifraga
Apis mellifera-Scabiosa
Apis mellifera-Scilla
Apis mellifera-Scorzonera
Apis mellifera-Scrophularia
Apis mellifera-Secale
Apis mellifera-Sedum
Apis mellifera-Senecio
Apis mellifera-Sherardia
Apis mellifera-Silene
Apis mellifera-Sinapis
Apis mellifera-Solanum
Apis mellifera-Solidago
Apis mellifera-Sorbus
Apis mellifera-Spergula
Apis mellifera-Spinacia
Apis mellifera-Stachys
Apis mellifera-Styphnolobium
Apis mellifera-Succisa
Apis mellifera-Symphoricarpos
Apis mellifera-Symphytum
Apis mellifera-Syringa
Apis mellifera-Taraxacum
Apis mellifera-Taxus
Apis mellifera-Teucrium
Apis mellifera-Thalictrum
Apis mellifera-Thymus
Apis mellifera-Tilia
Apis mellifera-Tradescantia
Apis mellifera-Trifolium
Apis mellifera-Triticum
Apis mellifera-Tropaeolum
Apis mellifera-Tulipa
Apis mellifera-Tussilago
Apis mellifera-Typha
Apis mellifera-Ulex
Apis mellifera-Ulmus
Apis mellifera-Urtica
Apis mellifera-Vaccinium
Apis mellifera-Valeriana
Apis mellifera-Verbascum
Apis mellifera-Veronica
Apis mellifera-Viburnum
Apis mellifera-Vicia
Apis mellifera-Viola
Apis mellifera-Viscum
Apis mellifera-Wisteria
Apis mellifera-Zea
Biastes truncatus-Convolvulus
Bombus barbutellus-Buddleia
Bombus barbutellus-Carduus
Bombus barbutellus-Centaurea
Bombus barbutellus-Cirsium
Bombus barbutellus-Crataegus
Bombus barbutellus-Glechoma
Bombus barbutellus-Lamium
Bombus barbutellus-Onopordum
Bombus barbutellus-Scabiosa
Bombus barbutellus-Taraxacum
Bombus barbutellus-Trifolium
Bombus barbutellus-Vicia
Bombus bohemicus-Calluna
Bombus bohemicus-Carduus
Bombus bohemicus-Centaurea
Bombus bohemicus-Cirsium
Bombus bohemicus-Onopordum
Bombus bohemicus-Rubus
Bombus bohemicus-Scabiosa
Bombus bohemicus-Succisa
Bombus bohemicus-Taraxacum
Bombus bohemicus-Vaccinium
Bombus campestris-Carduus
Bombus campestris-Centaurea
Bombus campestris-Cirsium
Bombus campestris-Crataegus
Bombus campestris-Glechoma
Bombus campestris-Onopordum
Bombus campestris-Rubus
Bombus campestris-Scabiosa
Bombus campestris-Succisa
Bombus campestris-Taraxacum
Bombus campestris-Trifolium
Bombus cryptarum-Calluna
Bombus cryptarum-Cirsium
Bombus cryptarum-Lotus
Bombus cryptarum-Prunus
Bombus cryptarum-Salix
Bombus cryptarum-Succisa
Bombus cryptarum-Vaccinium
Bombus cullumanus-Carduus
Bombus cullumanus-Centaurea
Bombus cullumanus-Cirsium
Bombus cullumanus-Origanum
Bombus cullumanus-Trifolium
Bombus distinguendus-Anthyllis
Bombus distinguendus-Campanula
Bombus distinguendus-Centaurea
Bombus distinguendus-Cirsium
Bombus distinguendus-Daucus
Bombus distinguendus-Galeopsis
Bombus distinguendus-Geranium
Bombus distinguendus-Heracleum
Bombus distinguendus-Hypochaeris
Bombus distinguendus-Lotus
Bombus distinguendus-Phacelia
Bombus distinguendus-Raphanus
Bombus distinguendus-Rhinanthus
Bombus distinguendus-Stachys
Bombus distinguendus-Succisa
Bombus distinguendus-Trifolium
Bombus distinguendus-Vicia
Bombus hortorum-Arctium
Bombus hortorum-Buddleia
Bombus hortorum-Carduus
Bombus hortorum-Cirsium
Bombus hortorum-Digitalis
Bombus hortorum-Dipsacus
Bombus hortorum-Glechoma
Bombus hortorum-Hyacinthoides
Bombus hortorum-Lamium
Bombus hortorum-Lonicera
Bombus hortorum-Prunella
Bombus hortorum-Prunus
Bombus hortorum-Salix
Bombus hortorum-Stachys
Bombus hortorum-Succisa
Bombus hortorum-Symphytum
Bombus hortorum-Taraxacum
Bombus hortorum-Teucrium
Bombus hortorum-Trifolium
Bombus hortorum-Ulex
Bombus hortorum-Vicia
Bombus humilis-Anthyllis
Bombus humilis-Ballota
Bombus humilis-Centaurea
Bombus humilis-Cirsium
Bombus humilis-Clinopodium
Bombus humilis-Crepis
Bombus humilis-Dipsacus
Bombus humilis-Echium
Bombus humilis-Helminthotheca
Bombus humilis-Hypochaeris
Bombus humilis-Lamium
Bombus humilis-Lathyrus
Bombus humilis-Lonicera
Bombus humilis-Lotus
Bombus humilis-Odontites
Bombus humilis-Rosa
Bombus humilis-Scabiosa
Bombus humilis-Sonchus
Bombus humilis-Trifolium
Bombus humilis-Vicia
Bombus hypnorum-Brassica
Bombus hypnorum-Cotoneaster
Bombus hypnorum-Dipsacus
Bombus hypnorum-Prunus
Bombus hypnorum-Rhododendron
Bombus hypnorum-Rosa
Bombus hypnorum-Rubus
Bombus hypnorum-Salix
Bombus hypnorum-Symphytum
Bombus jonellus-Calluna
Bombus jonellus-Cirsium
Bombus jonellus-Jacobaea
Bombus jonellus-Rubus
Bombus jonellus-Salix
Bombus jonellus-Scabiosa
Bombus jonellus-Thymus
Bombus jonellus-Trifolium
Bombus jonellus-Vaccinium
Bombus lapidarius-Brassica
Bombus lapidarius-Buddleia
Bombus lapidarius-Centaurea
Bombus lapidarius-Cirsium
Bombus lapidarius-Dipsacus
Bombus lapidarius-Hypericum
Bombus lapidarius-Jacobaea
Bombus lapidarius-Lotus
Bombus lapidarius-Melilotus
Bombus lapidarius-Prunus
Bombus lapidarius-Rubus
Bombus lapidarius-Salix
Bombus lapidarius-Taraxacum
Bombus lapidarius-Trifolium
Bombus lapidarius-Ulex
Bombus lucorum-Buddleia
Bombus lucorum-Calluna
Bombus lucorum-Centaurea
Bombus lucorum-Cirsium
Bombus lucorum-Dipsacus
Bombus lucorum-Echium
Bombus lucorum-Jacobaea
Bombus lucorum-Lonicera
Bombus lucorum-Prunus
Bombus lucorum-Rubus
Bombus lucorum-Salix
Bombus lucorum-Scabiosa
Bombus lucorum-Symphytum
Bombus magnus-Anthyllis
Bombus magnus-Calluna
Bombus magnus-Cirsium
Bombus magnus-Prunus
Bombus magnus-Salix
Bombus magnus-Succisa
Bombus magnus-Vaccinium
Bombus muscorum-Calluna
Bombus muscorum-Centaurea
Bombus muscorum-Cirsium
Bombus muscorum-Diplotaxis
Bombus muscorum-Dipsacus
Bombus muscorum-Echium
Bombus muscorum-Epilobium
Bombus muscorum-Helminthotheca
Bombus muscorum-Lathyrus
Bombus muscorum-Lotus
Bombus muscorum-Rubus
Bombus muscorum-Sonchus
Bombus muscorum-Succisa
Bombus muscorum-Trifolium
Bombus muscorum-Tripolium
Bombus muscorum-Vicia
Bombus norvegicus-Carduus
Bombus norvegicus-Centaurea
Bombus norvegicus-Cirsium
Bombus norvegicus-Knautia
Bombus norvegicus-Onopordum
Bombus norvegicus-Scabiosa
Bombus norvegicus-Taraxacum
Bombus pascuorum-Aster
Bombus pascuorum-Ballota
Bombus pascuorum-Buddleia
Bombus pascuorum-Centaurea
Bombus pascuorum-Cirsium
Bombus pascuorum-Digitalis
Bombus pascuorum-Hedera
Bombus pascuorum-Impatiens
Bombus pascuorum-Lamium
Bombus pascuorum-Mesembryanthemum
Bombus pascuorum-Prunella
Bombus pascuorum-Prunus
Bombus pascuorum-Rubus
Bombus pascuorum-Salix
Bombus pascuorum-Scabiosa
Bombus pascuorum-Succisa
Bombus pascuorum-Symphytum
Bombus pascuorum-Taraxacum
Bombus pascuorum-Tussilago
Bombus pascuorum-Ulex
Bombus pomorum-Knautia
Bombus pomorum-Trifolium
Bombus pratorum-Cotoneaster
Bombus pratorum-Geranium
Bombus pratorum-Lamium
Bombus pratorum-Prunus
Bombus pratorum-Rhododendron
Bombus pratorum-Ribes
Bombus pratorum-Rubus
Bombus pratorum-Salix
Bombus pratorum-Succisa
Bombus pratorum-Symphytum
Bombus pratorum-Taraxacum
Bombus pratorum-Trifolium
Bombus pratorum-Tussilago
Bombus ruderarius-Anthyllis
Bombus ruderarius-Ballota
Bombus ruderarius-Erodium
Bombus ruderarius-Glechoma
Bombus ruderarius-Lamium
Bombus ruderarius-Lotus
Bombus ruderarius-Rubus
Bombus ruderarius-Salix
Bombus ruderarius-Scabiosa
Bombus ruderarius-Trifolium
Bombus ruderatus-Anthyllis
Bombus ruderatus-Borago
Bombus ruderatus-Carduus
Bombus ruderatus-Centaurea
Bombus ruderatus-Cirsium
Bombus ruderatus-Dipsacus
Bombus ruderatus-Echium
Bombus ruderatus-Lamium
Bombus ruderatus-Lathyrus
Bombus ruderatus-Lotus
Bombus ruderatus-Stachys
Bombus ruderatus-Symphytum
Bombus ruderatus-Trifolium
Bombus rupestris-Anthyllis
Bombus rupestris-Brassica
Bombus rupestris-Carduus
Bombus rupestris-Centaurea
Bombus rupestris-Cirsium
Bombus rupestris-Dipsacus
Bombus rupestris-Jacobaea
Bombus rupestris-Knautia
Bombus rupestris-Lavandula
Bombus rupestris-Leucanthemum
Bombus rupestris-Mesembryanthemum
Bombus rupestris-Onopordum
Bombus rupestris-Rubus
Bombus rupestris-Scabiosa
Bombus rupestris-Succisa
Bombus rupestris-Symphytum
Bombus rupestris-Taraxacum
Bombus soroeensis-Calluna
Bombus soroeensis-Campanula
Bombus soroeensis-Centaurea
Bombus soroeensis-Chamaenerion
Bombus soroeensis-Erica
Bombus soroeensis-Lamium
Bombus soroeensis-Lotus
Bombus soroeensis-Rubus
Bombus soroeensis-Succisa
Bombus soroeensis-Symphytum
Bombus soroeensis-Trifolium
Bombus subterraneus-Dipsacus
Bombus subterraneus-Echium
Bombus subterraneus-Lamium
Bombus subterraneus-Lonicera
Bombus subterraneus-Rubus
Bombus subterraneus-Symphytum
Bombus subterraneus-Trifolium
Bombus sylvarum-Ballota
Bombus sylvarum-Cirsium
Bombus sylvarum-Dipsacus
Bombus sylvarum-Helminthotheca
Bombus sylvarum-Jacobaea
Bombus sylvarum-Lamium
Bombus sylvarum-Lathyrus
Bombus sylvarum-Odontites
Bombus sylvarum-Rubus
Bombus sylvarum-Scabiosa
Bombus sylvarum-Trifolium
Bombus sylvarum-Vicia
Bombus sylvestris-Carduus
Bombus sylvestris-Centaurea
Bombus sylvestris-Cirsium
Bombus sylvestris-Knautia
Bombus sylvestris-Lamium
Bombus sylvestris-Onopordum
Bombus sylvestris-Rubus
Bombus sylvestris-Scabiosa
Bombus sylvestris-Succisa
Bombus sylvestris-Taraxacum
Bombus sylvestris-Vaccinium
Bombus terrestris-Aster
Bombus terrestris-Buddleia
Bombus terrestris-Centaurea
Bombus terrestris-Cirsium
Bombus terrestris-Crocus
Bombus terrestris-Dipsacus
Bombus terrestris-Hedera
Bombus terrestris-Hyacinthoides
Bombus terrestris-Lonicera
Bombus terrestris-Mahonia
Bombus terrestris-Mesembryanthemum
Bombus terrestris-Narcissus
Bombus terrestris-Prunus
Bombus terrestris-Rubus
Bombus terrestris-Salix
Bombus terrestris-Succisa
Bombus terrestris-Symphoricarpos
Bombus terrestris-Ulex
Bombus vestalis-Arctium
Bombus vestalis-Cirsium
Bombus vestalis-Dipsacus
Bombus vestalis-Glechoma
Bombus vestalis-Lamium
Bombus vestalis-Lavandula
Bombus vestalis-Mesembryanthemum
Bombus vestalis-Prunus
Bombus vestalis-Rubus
Bombus vestalis-Salix
Bombus vestalis-Taraxacum
Chelostoma campanularum-Campanula
Chelostoma campanularum-Cephalanthera
Chelostoma campanularum-Edraianthus
Chelostoma campanularum-Jasione
Chelostoma campanularum-Phyteuma
Chelostoma florisomne-Ficaria
Chelostoma florisomne-Ranunculus
Chelostoma florisomne-Rosa
Chelostoma florisomne-Valeriana
Chelostoma florisomne-Veronica
Chelostoma rapunculi-Campanula
Coelioxys conica-Bryonia
Coelioxys conica-Lotus
Coelioxys conoidea-Cakile
Coelioxys conoidea-Calystegia
Coelioxys conoidea-Carduus
Coelioxys conoidea-Centaurea
Coelioxys conoidea-Cirsium
Coelioxys conoidea-Echium
Coelioxys conoidea-Epilobium
Coelioxys conoidea-Eryngium
Coelioxys conoidea-Hieracium
Coelioxys conoidea-Jacobaea
Coelioxys conoidea-Jasione
Coelioxys conoidea-Knautia
Coelioxys conoidea-Limonium
Coelioxys conoidea-Lotus
Coelioxys conoidea-Malva
Coelioxys conoidea-Rubus
Coelioxys conoidea-Sedum
Coelioxys conoidea-Thymus
Coelioxys elongata-Chamaenerion
Coelioxys elongata-Echium
Coelioxys elongata-Inula
Coelioxys elongata-Jasione
Coelioxys elongata-Knautia
Coelioxys elongata-Leontodon
Coelioxys elongata-Lotus
Coelioxys elongata-Pulicaria
Coelioxys elongata-Solidago
Coelioxys elongata-Trifolium
Coelioxys inermis-Erica
Coelioxys inermis-Jasione
Coelioxys inermis-Knautia
Coelioxys inermis-Lotus
Coelioxys inermis-Rubus
Coelioxys inermis-Scabiosa
Coelioxys inermis-Trifolium
Coelioxys mandibularis-Centaurea
Coelioxys mandibularis-Chamaenerion
Coelioxys mandibularis-Geranium
Coelioxys mandibularis-Jasione
Coelioxys mandibularis-Knautia
Coelioxys mandibularis-Lotus
Coelioxys mandibularis-Scabiosa
Coelioxys mandibularis-Solidago
Coelioxys mandibularis-Thymus
Coelioxys mandibularis-Trifolium
Coelioxys mandibularis-Vicia
Coelioxys rufescens-Allium
Coelioxys rufescens-Ballota
Coelioxys rufescens-Centaurea
Coelioxys rufescens-Cirsium
Coelioxys rufescens-Echium
Coelioxys rufescens-Eryngium
Coelioxys rufescens-Hieracium
Coelioxys rufescens-Knautia
Coelioxys rufescens-Lathyrus
Coelioxys rufescens-Lotus
Coelioxys rufescens-Melilotus
Coelioxys rufescens-Origanum
Coelioxys rufescens-Rubus
Coelioxys rufescens-Salvia
Coelioxys rufescens-Scabiosa
Coelioxys rufescens-Stachys
Coelioxys rufescens-Trifolium
Coelioxys rufescens-Vicia
Colletes cunicularius-Acer
Colletes cunicularius-Ilex
Colletes cunicularius-Malus
Colletes cunicularius-Prunus
Colletes cunicularius-Pyrus
Colletes cunicularius-Salix
Colletes cunicularius-Smyrnium
Colletes cunicularius-Sorbus
Colletes cunicularius-Taraxacum
Colletes daviesanus-Achillea
Colletes daviesanus-Anthemis
Colletes daviesanus-Chamaemelum
Colletes daviesanus-Cota
Colletes daviesanus-Erigeron
Colletes daviesanus-Helichrysum
Colletes daviesanus-Jacobaea
Colletes daviesanus-Leucanthemum
Colletes daviesanus-Pulicaria
Colletes daviesanus-Tanacetum
Colletes daviesanus-Tripleurospermum
Colletes floralis-Centaurea
Colletes floralis-Centaurium
Colletes floralis-Daucus
Colletes floralis-Eryngium
Colletes floralis-Galium
Colletes floralis-Heracleum
Colletes floralis-Hypochaeris
Colletes floralis-Jacobaea
Colletes floralis-Jasione
Colletes floralis-Oenanthe
Colletes floralis-Pastinaca
Colletes floralis-Ranunculus
Colletes floralis-Rubus
Colletes floralis-Sagina
Colletes floralis-Thymus
Colletes floralis-Trifolium
Colletes fodiens-Achillea
Colletes fodiens-Cota
Colletes fodiens-Erigeron
Colletes fodiens-Helichrysum
Colletes fodiens-Inula
Colletes fodiens-Jacobaea
Colletes fodiens-Pulicaria
Colletes fodiens-Tanacetum
Colletes fodiens-Tripleurospermum
Colletes halophilus-Helminthotheca
Colletes halophilus-Jacobaea
Colletes halophilus-Picris
Colletes halophilus-Reseda
Colletes halophilus-Sonchus
Colletes halophilus-Tripolium
Colletes impunctatus-Trifolium
Colletes marginatus-Medicago
Colletes marginatus-Melilotus
Colletes marginatus-Reseda
Colletes marginatus-Rubus
Colletes marginatus-Trifolium
Colletes similis-Achillea
Colletes similis-Chamaemelum
Colletes similis-Cota
Colletes similis-Erigeron
Colletes similis-Inula
Colletes similis-Jacobaea
Colletes similis-Leucanthemum
Colletes similis-Solidago
Colletes similis-Tanacetum
Colletes similis-Tripleurospermum
Colletes succinctus-Achillea
Colletes succinctus-Calluna
Colletes succinctus-Cirsium
Colletes succinctus-Erica
Colletes succinctus-Hedera
Colletes succinctus-Jacobaea
Colletes succinctus-Melilotus
Colletes succinctus-Rubus
Dasypoda hirtipes-Centaurea
Dasypoda hirtipes-Chondrilla
Dasypoda hirtipes-Cichorium
Dasypoda hirtipes-Cirsium
Dasypoda hirtipes-Crepis
Dasypoda hirtipes-Hieracium
Dasypoda hirtipes-Hypochaeris
Dasypoda hirtipes-Jacobaea
Dasypoda hirtipes-Leontodon
Dasypoda hirtipes-Picris
Dasypoda hirtipes-Pilosella
Dasypoda hirtipes-Pulicaria
Dasypoda hirtipes-Sonchus
Dasypoda suripes-Knautia
Dufourea dentiventris-Campanula
Dufourea dentiventris-Phyteuma
Dufourea halictula-Jasione
Dufourea inermis-Campanula
Dufourea minuta-Hieracium
Dufourea minuta-Jacobaea
Dufourea minuta-Jasione
Dufourea minuta-Leontodon
Dufourea minuta-Taraxacum
Dufourea minuta-Tripleurospermum
Epeoloides coecutiens-Achillea
Epeoloides coecutiens-Calluna
Epeoloides coecutiens-Chamaenerion
Epeoloides coecutiens-Jasione
Epeoloides coecutiens-Knautia
Epeoloides coecutiens-Lythrum
Epeoloides coecutiens-Pilosella
Epeoloides coecutiens-Rubus
Epeoloides coecutiens-Trifolium
Epeolus alpinus-Centaurea
Epeolus alpinus-Chamaenerion
Epeolus alpinus-Pilosella
Epeolus alpinus-Potentilla
Epeolus alpinus-Sedum
Epeolus alpinus-Thymus
Epeolus alpinus-Trifolium
Epeolus cruciger-Calluna
Epeolus cruciger-Jacobaea
Epeolus cruciger-Jasione
Epeolus cruciger-Tanacetum
Epeolus cruciger-Trifolium
Epeolus variegatus-Achillea
Epeolus variegatus-Cota
Epeolus variegatus-Jacobaea
Epeolus variegatus-Jasione
Epeolus variegatus-Knautia
Epeolus variegatus-Pulicaria
Epeolus variegatus-Tanacetum
Epeolus variegatus-Tripolium
Eucera longicornis-Ajuga
Eucera longicornis-Anthyllis
Eucera longicornis-Glechoma
Eucera longicornis-Lathyrus
Eucera longicornis-Lotus
Eucera longicornis-Medicago
Eucera longicornis-Trifolium
Eucera longicornis-Vicia
Halictus compressus-Centaurea
Halictus compressus-Cichorium
Halictus compressus-Knautia
Halictus confusus-Brassica
Halictus confusus-Calluna
Halictus confusus-Cardamine
Halictus confusus-Jasione
Halictus confusus-Melilotus
Halictus confusus-Potentilla
Halictus confusus-Rubus
Halictus confusus-Salix
Halictus confusus-Sinapis
Halictus confusus-Tanacetum
Halictus confusus-Taraxacum
Halictus confusus-Trifolium
Halictus confusus-Veronica
Halictus leucaheneus-Anthemis
Halictus leucaheneus-Berteroa
Halictus leucaheneus-Brassica
Halictus leucaheneus-Calluna
Halictus leucaheneus-Centaurea
Halictus leucaheneus-Jasione
Halictus leucaheneus-Leontodon
Halictus leucaheneus-Matricaria
Halictus leucaheneus-Pilosella
Halictus leucaheneus-Potentilla
Halictus leucaheneus-Raphanus
Halictus leucaheneus-Salvia
Halictus leucaheneus-Sinapis
Halictus leucaheneus-Taraxacum
Halictus leucaheneus-Veronica
Halictus maculatus-Achillea
Halictus maculatus-Anthericum
Halictus maculatus-Brassica
Halictus maculatus-Bunias
Halictus maculatus-Centaurea
Halictus maculatus-Cirsium
Halictus maculatus-Cota
Halictus maculatus-Crataegus
Halictus maculatus-Crepis
Halictus maculatus-Daucus
Halictus maculatus-Heracleum
Halictus maculatus-Isatis
Halictus maculatus-Jasione
Halictus maculatus-Leucanthemum
Halictus maculatus-Matricaria
Halictus maculatus-Melilotus
Halictus maculatus-Picris
Halictus maculatus-Pilosella
Halictus maculatus-Potentilla
Halictus maculatus-Prunus
Halictus maculatus-Ranunculus
Halictus maculatus-Rubus
Halictus maculatus-Salix
Halictus maculatus-Sinapis
Halictus maculatus-Tanacetum
Halictus maculatus-Taraxacum
Halictus maculatus-Trifolium
Halictus quadricinctus-Carduus
Halictus quadricinctus-Centaurea
Halictus quadricinctus-Cichorium
Halictus quadricinctus-Cirsium
Halictus quadricinctus-Convolvulus
Halictus quadricinctus-Cornus
Halictus quadricinctus-Echium
Halictus quadricinctus-Helminthotheca
Halictus quadricinctus-Hypochaeris
Halictus quadricinctus-Knautia
Halictus quadricinctus-Leontodon
Halictus quadricinctus-Ligustrum
Halictus quadricinctus-Papaver
Halictus quadricinctus-Picris
Halictus quadricinctus-Pilosella
Halictus quadricinctus-Ranunculus
Halictus quadricinctus-Sonchus
Halictus quadricinctus-Taraxacum
Halictus quadricinctus-Valeriana
Halictus rubicundus-Brassica
Halictus rubicundus-Centaurea
Halictus rubicundus-Cichorium
Halictus rubicundus-Cirsium
Halictus rubicundus-Ficaria
Halictus rubicundus-Geranium
Halictus rubicundus-Heracleum
Halictus rubicundus-Hypochaeris
Halictus rubicundus-Isatis
Halictus rubicundus-Jacobaea
Halictus rubicundus-Jasione
Halictus rubicundus-Leontodon
Halictus rubicundus-Leucanthemum
Halictus rubicundus-Malus
Halictus rubicundus-Melilotus
Halictus rubicundus-Pastinaca
Halictus rubicundus-Pilosella
Halictus rubicundus-Potentilla
Halictus rubicundus-Pyrus
Halictus rubicundus-Ranunculus
Halictus rubicundus-Rubus
Halictus rubicundus-Salix
Halictus rubicundus-Senecio
Halictus rubicundus-Sinapis
Halictus rubicundus-Sonchus
Halictus rubicundus-Succisa
Halictus rubicundus-Tanacetum
Halictus rubicundus-Taraxacum
Halictus rubicundus-Trifolium
Halictus sexcinctus-Centaurea
Halictus sexcinctus-Cichorium
Halictus sexcinctus-Cirsium
Halictus sexcinctus-Convolvulus
Halictus sexcinctus-Hypochaeris
Halictus sexcinctus-Inula
Halictus sexcinctus-Knautia
Halictus sexcinctus-Leontodon
Halictus sexcinctus-Papaver
Halictus sexcinctus-Picris
Halictus sexcinctus-Pilosella
Halictus sexcinctus-Scabiosa
Halictus sexcinctus-Succisa
Halictus sexcinctus-Taraxacum
Halictus tumulorum-Argentina
Halictus tumulorum-Bellis
Halictus tumulorum-Berteroa
Halictus tumulorum-Brassica
Halictus tumulorum-Calendula
Halictus tumulorum-Campanula
Halictus tumulorum-Centaurea
Halictus tumulorum-Cichorium
Halictus tumulorum-Cirsium
Halictus tumulorum-Convolvulus
Halictus tumulorum-Echinops
Halictus tumulorum-Ficaria
Halictus tumulorum-Heracleum
Halictus tumulorum-Hypericum
Halictus tumulorum-Hypochaeris
Halictus tumulorum-Jasione
Halictus tumulorum-Leontodon
Halictus tumulorum-Leucanthemum
Halictus tumulorum-Lychnis
Halictus tumulorum-Lythrum
Halictus tumulorum-Malus
Halictus tumulorum-Papaver
Halictus tumulorum-Pilosella
Halictus tumulorum-Potentilla
Halictus tumulorum-Prunus
Halictus tumulorum-Ranunculus
Halictus tumulorum-Reseda
Halictus tumulorum-Rorippa
Halictus tumulorum-Rubus
Halictus tumulorum-Salix
Halictus tumulorum-Sinapis
Halictus tumulorum-Sonchus
Halictus tumulorum-Stellaria
Halictus tumulorum-Tanacetum
Halictus tumulorum-Taraxacum
Halictus tumulorum-Trifolium
Halictus tumulorum-Veronica
Heriades truncorum-Achillea
Heriades truncorum-Anthemis
Heriades truncorum-Buphthalmum
Heriades truncorum-Calendula
Heriades truncorum-Carduus
Heriades truncorum-Centaurea
Heriades truncorum-Cichorium
Heriades truncorum-Cirsium
Heriades truncorum-Cota
Heriades truncorum-Crepis
Heriades truncorum-Erigeron
Heriades truncorum-Helenium
Heriades truncorum-Hypochaeris
Heriades truncorum-Inula
Heriades truncorum-Jacobaea
Heriades truncorum-Leontodon
Heriades truncorum-Picris
Heriades truncorum-Pulicaria
Heriades truncorum-Rudbeckia
Heriades truncorum-Senecio
Heriades truncorum-Sonchus
Heriades truncorum-Symphyotrichum
Heriades truncorum-Tanacetum
Heriades truncorum-Telekia
Heriades truncorum-Tripleurospermum
Hoplitis adunca-Echium
Hoplitis anthocopoides-Echium
Hoplitis claviventris-Centaurea
Hoplitis claviventris-Crepis
Hoplitis claviventris-Echium
Hoplitis claviventris-Hippocrepis
Hoplitis claviventris-Hypericum
Hoplitis claviventris-Lathyrus
Hoplitis claviventris-Linaria
Hoplitis claviventris-Lotus
Hoplitis claviventris-Melilotus
Hoplitis claviventris-Onobrychis
Hoplitis claviventris-Ranunculus
Hoplitis claviventris-Rubus
Hoplitis claviventris-Scabiosa
Hoplitis claviventris-Securigera
Hoplitis claviventris-Sedum
Hoplitis claviventris-Trifolium
Hoplitis claviventris-Vicia
Hoplitis leucomelana-Lathyrus
Hoplitis leucomelana-Leontodon
Hoplitis leucomelana-Lotus
[truncated: 1,496 more rows]
